# Supplementary material
Source: publisher figshare collection journal article supplement (https://brill.figshare.com/ndownloader/files/34398878)
Supplement: Supplementary file 1 [file 34398878]

**Appendix to: Constraints on population growth of blue monkeys (*Cercopithecus mitis*) in Kibale National Park, Uganda**

**Hannah Frogge**a**, Revee A. Jones**b**, Samuel Angedakin**c**, Richard Busobozi**d**, Prime Kabagambe**d**, Felix O. Angwela**d,e**, Nicole Thompson González**a **and Michelle Brown**a,f,g,*

a Department of Anthropology, University of California, Santa Barbara, CA, USA

b Division of Solid Tumor Oncology, Memorial Sloan Kettering Cancer Center, New York, NY, USA

c Department of Primatology, Max Planck Institute for Evolutionary Anthropology, Leipzig, Germany

d Makerere University Biological Field Stations, Kampala, Uganda

e School of Agriculture and Environmental Science, Mountains of the Moon University, Fort Portal, Uganda

f Department for the Ecology of Animal Societies, Max Planck Institute of Animal Behavior, Konstanz, Germany

g Department of Biology, University of Konstanz, Konstanz, Germany

**Table A1.**

Changes in group size and population density of blue monkeys at the Ngogo and Kanyawara sites in Kibale National Park, Uganda, and their primary primate competitors.

| Species (site) | Period | Group size1 | Groups per km2 | Density (indiv/km2) | % change | Sources |
| --- | --- | --- | --- | --- | --- | --- |
| Blue monkeys (Ngogo) | 1981–1982  1983  1984  1985  2009  2013–2014  2015–2018 | 7.50  7.33  5.50  3.75  11.40  6.00  6.30 | 0.29  0.29  0.29  0.29  0.38  0.53  0.70 | 2.18  2.13  1.60  1.09  4.30  3.18  4.41 | +17% | 1  1  2  2  3,4  4  4 |
| Blue monkeys (Kanyawara) | 1973  1978–1980  1981–1982  1983–1984  2014  2018–2020 | 12.00  11.00  9.29  8.78  7.84  11.00 | 2.94  2.94  2.94  2.94  3.29  3.29 | 33.08  32.34  30.87  29.40  25.81  36.19 | +9% | 5, 1  1, 1  1, 1  1, 1  6, 4  4 |
| Red-tailed monkeys (Ngogo) | 1981–1983  1986  1998  1999  2000  2008  2012–2013  2014–2015  2015  2016 | 10.17  6.00  12.75  13.25  11.67  10.50  12.80  16.30  14.50  17.70 | 4.40  4.40  3.60  3.60  6.00  5.27  5.27  5.27  5.27  5.27 | 44.73  26.40  45.90  47.70  70.00  55.34  67.46  85.90  76.42  93.28 | +109% | 7  7  8  8  8  9  9  10  10  10 |
| Grey-cheeked mangabeys (Ngogo) | 1977  1992–1993  2008–2009  2015–2017 | 8.75  8.89  11.40  11.40 | 0.80  0.80  1.46  1.16 | 7.00  7.11  16.65  13.19 | +88% | 11, 1  12, 1  13  13 |
| Chimpanzees (Ngogo) | 1998  2003  2004–2006  2014–2015 | 87.00  89.00  96.50  132.00 | 0.035  0.035  0.035  0.035 | 3.00  3.07  3.33  4.55 | +52% | 14, 15  16, 15  17, 15  18, 15 |

Records represent studies that followed >1 group, and where concurrent information on group size and density were available. Sources: 1 Butynski (1990); 2 Lwanga (1987); 3 Angedakin & Lwanga (2011); 4 this study; 5 Rudran (1977); 6 Chapman et al. (2018); 7 Struhsaker & Leland (1988); 8 Windfelder & Lwanga (2002); 9 Brown (2013); 10 McLester et al. (2019); 11 Wallis (1978); 12 Barrett (1995); 13 Brown & Waser (2018); 14 Mitani & Watts (1999); 15 Mitani et al. (2010); 16 Wakefield (2010); 17 Amsler (2009); 18 Sandel (2017).

1 Sum of adults and subadults, excluding juveniles and infants.

**Table A2.**

Important plant foods for blue monkeys (BL) at the Ngogo site in Kibale National Park, Uganda, and the overlap with important foods for other frugivorous monkeys.

|  | Plant species | BL | RT | MY | CH |
| --- | --- | --- | --- | --- | --- |
| 1 | *Blighia (Phialodiscus) unijugata* | x |  | x |  |
| 2 | *Celtis durandii* | x | x | x | x |
| 3 | *Chrysophyllum albidum* | x | x | x | x |
| 4 | *Cordia millenii* | x |  | x | x |
| 5 | *Dasylepis eggelingii* | x | x | x |  |
| 6 | *Diospyros (Maba) abyssinica* | x | x | x |  |
| 7 | *Ficus exasperata* | x | x |  | x |
| 8 | *Ficus mucuso* | x | x | x | x |
| 9 | *Ficus natalensis* | x | x | x | x |
| 10 | *Ficus sansibarica (brachylepis)* | x | x | x | x |
| 11 | *Ficus saussureana (eriobotryoides, dawei)* | x | x | x | x |
| 12 | *Funtumia africana (latifolia)* | x |  | x |  |
| 13 | *Markhamia platycalyx* | x | x | x |  |
| 14 | *Millettia dura (drastica)* | x | x | x |  |
| 15 | *Mimusops bagshawei* | x |  | x | x |
| 16 | *Monodora myristica* | x | x | x | x |
| 17 | *Morus mesozygia (lactea)* | x | x | x | x |
| 18 | *Olea capensis welwitschii* | x |  | x |  |
| 19 | *Oncinotis tenuiloba* | x |  |  |  |
| 20 | *Paullinia pinnata* | x | x | x |  |
| 21 | *Premna hildebrandtii* | x |  | x |  |
| 22 | *Pristimera graciliflora* | x | x | x |  |
| 23 | *Prunus (Pygeum) africana (africanum)* | x | x | x |  |
| 24 | *Pseudospondias microcarpa* | x | x | x | x |
| 25 | *Pterygota mildbraedii* | x |  | x | x |
| 26 | *Spathodea campanulata* | x |  |  |  |
| 27 | *Strombosia scheffleri* | x |  | x |  |
| 28 | *Syrpheonema fasciculatum* | x | x |  |  |
| 29 | *Tabernaemontana (Conopharyngia) holstii* | x | x | x |  |
| 30 | *Tabernaemontana (Conopharyngia) odoratissima* | x |  |  |  |
| 31 | *Treculia africana* | x |  | x | x |
| 32 | *Uvariopsis congensis* | x | x | x | x |
| 33 | *Warburgia ugandensis* | x | x | x |  |
| 34 | *Zanha golungensis* | x | x | x |  |

RT, red-tailed monkeys; MY, grey-cheeked mangabeys (Brown, 2011) and chimpanzees (CH; Watts et al., 2012). Foods that make up ≥1% of the annual plant diet of at least one group are designated as important species. Plant names that have changed are indicated with the former genus or species name in parentheses.

**References**

Amsler, S.J. (2009). Energetic costs of territorial boundary patrols by wild chimpanzees. — Am. J. Primatol. 71: 1-11.

Angedakin, S. & Lwanga, J.S. (2011). Changes in group size and composition of the blue monkeys (*Cercopithecus mitis stuhlmanni*) between 1984 and 2009 at Ngogo, Kibale National Park, Uganda. — Afr. J. Ecol. 49: 362-366.

Barrett, L. (1995). Foraging strategies, ranging behaviour and 'territoriality' among grey-cheeked mangabeys in Kibale Forest, Uganda.— PhD thesis, University of London, London.

Brown, M. (2011). Intergroup encounters in grey-cheeked mangabeys (*Lophocebus albigena*) and redtail monkeys (*Cercopithecus ascanius*): form and function. — PhD thesis, Columbia University, New York, NY.

Brown, M. (2013). Food and range defense in group-living primates. — Anim. Behav. 85: 807-816.

Brown, M. & Waser , P.M. (2018). Group movements in response to competitors' calls indicate conflicts of interest between male and female grey-cheeked mangabeys. Am. J. Primatol. 80: e22918.

Butynski, T. M. (1990). Comparative ecology of blue monkeys (*Cercopithecus mitis*) in high- and low-density subpopulations. — Ecol. Monogr. 60: 1-26.

Chapman, C.A., Bortolamiol, S., Matsuda, I., Omeja, P.A., Paim, F.P., Reyna-Hurtado, R., Sengupta, R. & Valenta, K. (2018). Primate population dynamics: variation in abundance over space and time. — Biodiv. Conserv. 27: 1221-1238.

Lwanga, J.S. (1987). Group fission in blue monkeys (*Cercopithecus mitis stuhlmanni*): effects on their socioecology in Kibale Forest, Uganda. M.S. thesis, Makerere University, Kampala.

McLester, E., Brown, M., Stewart, F. A. & Piel, A. K. (2019). Food abundance and weather influence habitat‐specific ranging patterns in forest‐and savanna mosaic‐dwelling red‐tailed monkeys (*Cercopithecus ascanius*). — Am. J. Phys. Anthropol. 170: 217-231.

Mitani, J.C. & Watts, D.P. (1999). Demographic influences on the hunting behavior of chimpanzees. — Am. J. Phys. Anthropol. 109: 439-454.

Mitani, J.C., Watts, D. & Amsler, S.J. (2010). Lethal intergroup aggression leads to territorial expansion in wild chimpanzees. — Curr. Biol. 20: R507-R508.

Rudran, R. (1977). Socioecology of the Blue Monkeys (*Cercopithecus mitis stuhlmanni*) of the Kibale Forest, Uganda. — Smithsonian Institution Press, Washington, DC.

Sandel, A.A. (2017). Male-Male Relationships and the Transition to Adulthood in Chimpanzees. PhD thesis, University of Michigan, Ann Arbor, MI.

Struhsaker, T.T. & Leland, L. (1988). Group fission in redtail monkeys (*Cercopithecus ascanius*) in the Kibale Forest, Uganda. — In: A primate radiation: evolutionary biology of the African guenons (Gautier-Hion, A., Bourliere, F., Gautier, J.-P. & Kingdon, J., eds). Cambridge University Press. Cambridge, p. 364-388).

Wakefield, M.L. (2010). Socioecology of female chimpanzees (*Pan troglodytes schweinfurthii*) in the Kibale National Park, Uganda: Social relationships, association patterns, and costs and benefits of gregariousness in a fission-fusion society. PhD thesis, Yale University, New Haven, CT.

Wallis, S.J. (1978). The socioecology of *Cercocebus albigena johnstoni* (Lydeker): an arboreal rainforest monkey. PhD thesis, University of London, London.

Watts, D.P., Potts, K.B., Lwanga, J.S. & Mitani, J.C. (2012). Diet of chimpanzees (*Pan troglodytes schweinfurthii*) at Ngogo, Kibale National Park, Uganda, 1. diet composition and diversity. — Am. J. Primatol. 74: 114-129.

Windfelder, T.L. & Lwanga, J.S. (2002). Group fission in red-tailed monkeys (*Cercopithecus ascanius*) in Kibale National Park, Uganda. — In: The Guenons: Diversity and Adaptation in African Monkeys (Glenn, M.E. & Cords, M. eds). Kluwer Academic / Plenum Publishing New York, NY, p. 147-159.
